# Supplementary material for: Pure Trans-Resveratrol Nanoparticles Prepared by a Supercritical Antisolvent Process Using Alcohol and Dichloromethane Mixtures: Effect of Particle Size on Dissolution and Bioavailability in Rats
Source: PubMed Central journal article supplement (PMC7222356; doi:10.3390/antiox9040342), 2020-04-22
Supplement: antioxidants-09-00342-s001.pdf [file antioxidants-09-00342-s001.pdf]

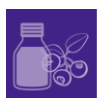

**Table S1.** DSC data of raw material, SAS processed nanoarticles and milled microparticles consisted of pure trans-resveratrol.

| Samples                                                              |                                         | Melting peak temperature (°C) | Fusion enthalpy ( $\Delta H$ , J/g) |
|----------------------------------------------------------------------|-----------------------------------------|-------------------------------|-------------------------------------|
| Raw material                                                         |                                         | 267.7 $\pm$ 0.7               | 265.6 $\pm$ 2.9                     |
|                                                                      | MeOH/DCM=25/75                          | 267.4 $\pm$ 0.6               | 263.7 $\pm$ 1.7                     |
|                                                                      | MeOH/DCM=50/50                          | 266.8 $\pm$ 0.7               | 261.5 $\pm$ 2.3                     |
| Nanoparticles<br>(SAS processed,<br>Solvent<br>composition<br>mass%) | MeOH/DCM=75/25                          | 268.5 $\pm$ 0.7               | 259.7 $\pm$ 2.8                     |
|                                                                      | MeOH/DCM=100/0                          | 267.1 $\pm$ 0.6               | 264.3 $\pm$ 2.7                     |
|                                                                      | EtOH/DCM=25/75                          | 268.1 $\pm$ 0.6               | 260.2 $\pm$ 1.9                     |
|                                                                      | EtOH /DCM=50/50                         | 266.3 $\pm$ 0.5               | 258.8 $\pm$ 2.9                     |
|                                                                      | EtOH /DCM=75/25                         | 268.5 $\pm$ 0.6               | 262.6 $\pm$ 2.8                     |
|                                                                      | EtOH /DCM=100/0                         | 266.8 $\pm$ 0.8               | 263.1 $\pm$ 2.6                     |
|                                                                      | Microparticles (milled by Fitz mill)    | 268.1 $\pm$ 0.3               | 257.6 $\pm$ 5.3                     |
|                                                                      | Microparticles (milled by air jet-mill) | 267.6 $\pm$ 0.5               | 261.7 $\pm$ 1.4                     |

Data are expressed as mean  $\pm$  standard deviation (n = 3). MeOH: methanol, DCM: dichloromethane, EtOH: ethanol.
